# Supplementary material for: Combining Advanced Analytical Methodologies to Uncover Suspect PFAS and Fluorinated Pharmaceutical Contributions to Extractable Organic Fluorine in Human Serum (Tromsø Study)
Source: PubMed Central journal article supplement (PMC11271008; doi:10.1021/acs.est.4c03758), 2024-07-10
Supplement: es4c03758_si_002.pdf [file es4c03758_si_002.pdf]

1 **Supplementary Information**

2 **Combining advanced analytical methodologies to uncover suspect**  
3 **PFAS and fluorinated pharmaceutical contributions to extractable**  
4 **organic fluorine in human serum (Tromsø Study)**

5 Lara Cioni<sup>1,2\*</sup>, Vladimir Nikiforov<sup>1</sup>, Jonathan P. Benskin<sup>3</sup>, Ana Carolina M. F. Coêlho<sup>2</sup>, Silvia  
6 Dudášova<sup>4</sup>, Melanie Z. Lauria<sup>3</sup>, Oliver J. Lechtenfeld<sup>4</sup>, Merle M. Plassmann<sup>3</sup>, Thorsten  
7 Reemtsma<sup>4</sup>, Torkjel M. Sandanger<sup>1,2</sup>, Dorte Herzke<sup>1,5</sup>

8 1. NILU, Fram Centre, Tromsø, NO-9296, Norway

9 2. UiT – The Arctic University of Norway, Department of Community Medicine, Tromsø, NO-  
10 9037, Norway

11 3. Stockholm University, Department of Environmental Science, Stockholm, SE-10691,  
12 Sweden

13 4. Helmholtz Centre for Environmental Research – UFZ, Leipzig, DE-04103 Germany

14 5. Norwegian Institute for Public Health, Oslo, NO-0213, Norway

15 **\*Corresponding authors**

16 Lara Cioni - Institute of Environmental Assessment and Water Research (IDAEA) - CSIC,  
17 Environmental and Water Chemistry for Human Health (ONHEALTH), Barcelona, ES-08034,  
18 Spain

19 [\\*lara.cioni@idaea.csic.es](mailto:lara.cioni@idaea.csic.es)

20

21

22 Summary: 16 pages, 10 tables

23

24

25 The following information is included:

- 26 • Pooled serum samples details (page S3)
- 27 • Sample preparation procedure (page S3)
- 28 • LC-Orbitrap-HRMS measurements details (page S4)
- 29 • Fluorine mass balance calculations (page S11)
- 30 • TOP assay on model CF3-pharmaceuticals and agrochemicals details (page S11)
- 31 • Statistical analysis details (page S12)

32

33 The following tables are included:

- 34 • Table S1 – Orbitrap Q-Exactive ion source and full scan and ddMS2 acquisition  
35 parameters.
- 36 • Table S2 – Orbitrap Exploris 120 ion source and full scan and ddMS2 acquisition  
37 parameters.
- 38 • Table S3 – Target PFAS ppm error in DI-FT-ICR-MS.
- 39 • Table S4 – patRoon suspect screening workflow parameters.
- 40 • Table S5– Target PFAS ppm error in LC-Orbitrap-HRMS.
- 41 • Table S6 – Information about suspects analytical standards.
- 42 • Table S7 – Suspects detected in 20 human serum pools analyzed by DI-FT-ICR-MS  
43 with a mass error  $<0.5$  ppm and a similarity score  $> 70$ .
- 44 • Table S8 - Suspect PFAS detected by LC-Orbitrap-HRMS with mass error  $< 2$  ppm.
- 45 • Table S9 - Multiple linear regression coefficients estimates and 95% confidence  
46 intervals for  $\ln(\text{PFECHS/UPFOS})$ ,  $\ln(\sum 13\text{PFAS})$ ,  $\ln(\sum \text{F-pharmaceuticals})$  and  
47  $\ln(\text{UEOF})$  in pooled serum samples from the Tromsø Study.
- 48 • Table S10 – Multiple linear regression (including sex and sampling year interaction  
49 terms) coefficients estimates and 95% confidence intervals for  $\ln(\text{PFECHS/UPFOS})$ ,  
50  $\ln(\sum 13\text{PFAS})$  and  $\ln(\text{UEOF})$  in pooled serum samples from the Tromsø Study.

## 51 **1. Materials and methods**

### 52 **1.1. Pooled serum samples**

53 Individual serum samples were pooled based on sampling year, sex, age and T2DM diagnosis.  
54 Pools 1 to 7 at each sampling year included the same individuals in 1986, 2007, and 2015. To  
55 have the largest possible number of pools including the same individuals, these pools were  
56 obtained mixing variable volumes (50, 100, or 150  $\mu\text{L}$ ) of individual serum samples but  
57 keeping the volume per individual constant throughout the sampling years. For the remaining  
58 pools, it was not possible to follow the same individuals through time and 15 participants (with  
59 matching sampling year, sex, age, and type-2 diabetes diagnosis) were included in each pool  
60 mixing 50  $\mu\text{L}$  of serum per individual. Detailed information about the serum pools  
61 characteristic (number of individuals, age range and mean, and type-2 diabetes status) can be  
62 found in our previous study [1].

### 63 **1.2. Sample preparation**

64 The extracts analysed for suspect screening (Figure 1) using DI-FT-ICR-MS and LC-Orbitrap-  
65 HRMS were the same used for EOF analysis with CIC in our previous fluorine mass-balance  
66 study [1]. The EOF extracts were obtained extracting 500  $\mu\text{L}$  of serum with 1 mL of ACN.  
67 Samples were vortexed and sonicated (10 min) 3 times, and after centrifugation at 10,000 rpm  
68 for 10 min, supernatants were transferred to 2 mL glass vials. To confirm/discard suspect  
69 assignments samples after TOP assay from our previous fluorine mass-balance study [1] were  
70 also run by LC-Orbitrap-HRMS (Figure 1). The TOP assay was performed on a portion of  
71 serum pools ACN extract. Prior to oxidation, ACN was removed by evaporation, and the dry  
72 extracts were reconstituted with 0.8 M  $\text{Na}_2\text{S}_2\text{O}_8$  and 10 M NaOH. Post oxidation, the samples  
73 were acidified and extracted with MTBE. Aliquots of the organic phase were transferred to  
74 vials with insert and spiked with recovery standard and 2% ammonia in methanol. The MTBE  
75 was evaporated prior analyses.

## 76 **1.2. LC-Orbitrap-HRMS measurements**

77 All 46 serum pools were first analyzed using a Dionex UltiMate 3000 Ultrahigh performance  
78 liquid chromatograph coupled to a Q Exactive HF hybrid Quadrupole-Orbitrap mass  
79 spectrometer (Thermo Fisher Scientific, Waltham, MA, USA) in full scan with data dependent  
80 MS2 (ddMS2) acquisition. The LC column was a Waters BEH C18 column (2.1x50 mm, 1.7  
81  $\mu\text{m}$ ) and analytes were separated with the LC gradient described by Miaz et al. using 2mM  
82  $\text{NH}_4\text{OAc}$  in 90:10 water:acetonitrile (A) and 2mM  $\text{NH}_4\text{OAc}$  in 99:1 acetonitrile:water (B) as  
83 mobile phases. The injection volume was 5  $\mu\text{l}$  and the LC gradient was the following: start  
84 (90% A, flow: 0.4 mL/min), 0.5 min (90% A, flow: 0.4 mL/min), 8.0 min (20% A, flow: 0.4  
85 mL/min), 8.1 min (0% A, flow: 0.4 mL/min), 11.0 min (0% A, flow: 0.4 mL/min), 11.1 min  
86 (90% A, flow: 0.4 mL/min), 13 min (90% A, flow: 0.4 mL/min) The MS acquisition parameters  
87 are reported in Table S1.

88 Thereafter, serum pools were re-analyzed on a different LC-Orbitrap-HRMS system, a  
89 Vanquish UHPLC coupled with an Orbitrap Exploris 120 (Thermo Fisher Scientific, Waltham,  
90 MA, USA). The LC was operated with an Acquity UPLC HSS T3 column (2.1x100 mm, 1.8  
91  $\mu\text{m}$ ) equipped with a Waters Van guard HSS T3 guard column (2.1x5 mm, 1.8  $\mu\text{m}$ ). The LC  
92 gradient described by Hanssen et al. [2] using 2mM  $\text{NH}_4\text{OAc}$  in 90:10 water:acetonitrile (A)  
93 and 2mM  $\text{NH}_4\text{OAc}$  in 99:1 acetonitrile:water (B) as mobile phases. The MS acquisition  
94 parameters are reported in Table S2.

95

96

97 **Table S1** – Orbitrap Q-Exactive ion source and full scan and ddMS2 acquisition parameters.

| <b>Ion source parameters</b>    |          |
|---------------------------------|----------|
| Ion source type                 | H-ESI    |
| Spray voltage (V)               | 3700     |
| Sheath gas (arb)                | 30       |
| Aux gas (arb)                   | 10       |
| Spare gas (arb)                 | 0        |
| Capillary temperature (°C)      | 350      |
| Aux gas heater temperature (°C) | 350      |
| S-lens RF level (arb)           | 50       |
| <b>Full scan parameters</b>     |          |
| Orbitrap resolution             | 120000   |
| Scan range (m/z)                | 200-1800 |
| AGC target                      | 3e6      |
| Maximum injection time (ms)     | 250      |
| Microscans                      | 1        |
| Data type                       | Profile  |
| Polarity                        | Negative |
| <b>ddMS2 parameters</b>         |          |
| Orbitrap resolution             | 15000    |
| AGC target                      | 2e5      |
| Maximum injection time (ms)     | 30       |
| Loop count                      | 5        |
| MSX count                       | 1        |
| TopN                            | 5        |
| Isolation window (m/z)          | 0.4      |
| Isolation offset (m/z)          | 0.0      |
| NCE                             | 35       |
| Microscans                      | 1        |
| Minimum AGC target              | 2e3      |
| Intensity threshold             | 6.7e4    |
| Apex trigger (s)                | 1 to 5   |
| Exclude isotopes                | on       |
| Dynamic exclusion (s)           | 5.0      |

98

99

100 **Table S2** – Orbitrap Exploris 120 ion source and full scan and ddMS2 acquisition parameters.

| <b>Ion source parameters</b>       |             |
|------------------------------------|-------------|
| Ion source type                    | H-ESI       |
| Spray voltage                      | Static      |
| Negative ion voltage (V)           | 2500        |
| Gas mode                           | Static      |
| Sheath gas (arb)                   | 40          |
| Aux gas (arb)                      | 5           |
| Sweep gas (arb)                    | 0           |
| Ion transfer tube temperature (°C) | 200         |
| Vaporizer temperature (°C)         | 300         |
| <b>Full scan parameters</b>        |             |
| Orbitrap resolution                | 120000      |
| Scan range (m/z)                   | 150-700     |
| RF lens (%)                        | 65          |
| Normalized AGC target (%)          | 100         |
| Maximum injection time (ms)        | 100         |
| Microscans                         | 1           |
| Data type                          | Profile     |
| Polarity                           | Negative    |
| <b>ddMS2 parameters</b>            |             |
| Isolation window (m/z)             | 0.8         |
| Isolation offset                   | Off         |
| Collision energy mode              | Stepped     |
| Collision energy type              | Absolute    |
| HCD collision energies (V)         | 15,35,60,75 |
| Orbitrap resolution                | 15000       |
| Scan range mode                    | Auto        |
| Normalized AGC target (%)          | 100         |
| Maximum injection time (ms)        | 100         |
| Microscans                         | 1           |
| Intensity threshold                | 1.0e4       |
| Apex detection desired window (%)  | 30          |

101

102

103 **1.3. Suspect screening data processing**

104 **Table S3** – Target PFAS ppm error in DI-FT-ICR-MS.

| <b>Compound</b> | <b>Molecular formula</b>                                         | <b>Theoretical m/z</b> | <b>ppm error</b> |
|-----------------|------------------------------------------------------------------|------------------------|------------------|
| PFHpA           | C <sub>7</sub> HF <sub>13</sub> O <sub>2</sub>                   | 362.96962              | 0.16 ± 0.09      |
| PFOA            | C <sub>8</sub> HF <sub>15</sub> O <sub>2</sub>                   | 412.96642              | 0.13 ± 0.05      |
| PFNA            | C <sub>9</sub> HF <sub>17</sub> O <sub>2</sub>                   | 462.96323              | 0.44 ± 0.04      |
| PFDA            | C <sub>10</sub> HF <sub>19</sub> O <sub>2</sub>                  | 512.96004              | 0.18 ± 0.06      |
| PFUnDA          | C <sub>11</sub> HF <sub>21</sub> O <sub>2</sub>                  | 562.95684              | 0.15 ± 0.10      |
| PFDoDA          | C <sub>12</sub> HF <sub>23</sub> O <sub>2</sub>                  | 612.95365              | Not detected     |
| PFHxS           | C <sub>6</sub> HF <sub>13</sub> O <sub>3</sub> S                 | 398.93660              | 0.13 ± 0.01      |
| PFHpS           | C <sub>7</sub> HF <sub>15</sub> O <sub>3</sub> S                 | 448.93341              | 0.20 ± 0.14      |
| PFOS            | C <sub>8</sub> HF <sub>17</sub> O <sub>3</sub> S                 | 498.93022              | 0.15 ± 0.08      |
| FOSAA           | C <sub>10</sub> H <sub>4</sub> F <sub>17</sub> NO <sub>4</sub> S | 555.95168              | Not detected     |
| Me-FOSAA        | C <sub>11</sub> H <sub>6</sub> F <sub>17</sub> NO <sub>4</sub> S | 569.96733              | Not detected     |
| Et-FOSAA        | C <sub>12</sub> H <sub>8</sub> F <sub>17</sub> NO <sub>4</sub> S | 583.98298              | 0.22 ± 0.10      |

105

106

107 **Table S4** – patRoan suspect screening workflow parameters.

| <b>Feature detection</b>                   |                                             |
|--------------------------------------------|---------------------------------------------|
| Function                                   | findFeatures                                |
| Algorithm                                  | OpenMS (default settings)                   |
| noiseThrInt                                | 1000                                        |
| chromSNR                                   | 3                                           |
| chromFWHM                                  | 5                                           |
| minFWHM                                    | 1                                           |
| maxFWHM                                    | 30                                          |
| <b>Feature retention time alignment</b>    |                                             |
| Function                                   | groupFeatures                               |
| Algorithm                                  | OpenMS (default settings)                   |
| <b>Feature filtering</b>                   |                                             |
| Function                                   | filter                                      |
| preAbsMinIntensity                         | 100                                         |
| absMinIntensity                            | 10000                                       |
| relMinReplicateAbundance                   | 0.3 (PFAS), 0 (fluorinated pharmaceuticals) |
| maxReplicateIntRSD                         | 1                                           |
| blankThreshold                             | 3                                           |
| removeBlanks                               | TRUE                                        |
| retentionRange                             | NULL                                        |
| mzRange                                    | NULL                                        |
| <b>Suspect screening</b>                   |                                             |
| Function                                   | screenSuspects                              |
| rtWindow                                   | 12                                          |
| mzWindow                                   | 0.008                                       |
| adduct                                     | [M-H]-                                      |
| onlyHits                                   | TRUE                                        |
| <b>MS2 annotation</b>                      |                                             |
| Function (retrieving MS2 peaks)            | generateMSPeakLists                         |
| maxMSRtWindow                              | 5                                           |
| precursorMzWindow                          | 4                                           |
| avgFeatParams                              | avgMSListParams                             |
| avgFGGroupParams                           | avgMSListParams                             |
| Function (filtering MS2 peaks)             | filter                                      |
| absMSIntThr                                | NULL                                        |
| absMSMSIntThr                              | NULL                                        |
| relMSIntThr                                | NULL                                        |
| relMSMSIntThr                              | 0.05                                        |
| topMSPeaks                                 | NULL                                        |
| topMSMSPeaks                               | 50                                          |
| Function (MS2 spectra database annotation) | generateCompounds                           |
| dbRelMzDev                                 | 5                                           |
| fragRelMzDev                               | 5                                           |
| fragAbsMzDev                               | 0.002                                       |
| adduct                                     | [M-H]-                                      |
| database                                   | Pubchem/Comptox                             |
| maxCandidatesToStop                        | 2500                                        |

108



109 **Table S5**– Target PFAS ppm error in LC-Orbitrap-HRMS.

| <b>Compound</b> | <b>Molecular formula</b>                                         | <b>Theoretical m/z</b> | <b>ppm error</b> |
|-----------------|------------------------------------------------------------------|------------------------|------------------|
| PFHpA           | C <sub>7</sub> HF <sub>13</sub> O <sub>2</sub>                   | 362.9696               | 0.8 ± 0.3        |
| PFOA            | C <sub>8</sub> HF <sub>15</sub> O <sub>2</sub>                   | 412.9664               | 0.8 ± 0.2        |
| PFNA            | C <sub>9</sub> HF <sub>17</sub> O <sub>2</sub>                   | 462.9632               | 1.1 ± 0.2        |
| PFDA            | C <sub>10</sub> HF <sub>19</sub> O <sub>2</sub>                  | 512.9600               | 0.2 ± 0.1        |
| PFUnDA          | C <sub>11</sub> HF <sub>21</sub> O <sub>2</sub>                  | 562.9568               | 0.4 ± 0.2        |
| PFDoDA          | C <sub>12</sub> HF <sub>23</sub> O <sub>2</sub>                  | 612.9537               | 0.6 ± 0.3        |
| PFHxS           | C <sub>6</sub> HF <sub>13</sub> O <sub>3</sub> S                 | 398.9366               | 0.5 ± 0.3        |
| PFHpS           | C <sub>7</sub> HF <sub>15</sub> O <sub>3</sub> S                 | 448.9334               | 0.9 ± 0.2        |
| PFOS            | C <sub>8</sub> HF <sub>17</sub> O <sub>3</sub> S                 | 498.9302               | 0.3 ± 0.2        |
| FOSAA           | C <sub>10</sub> H <sub>4</sub> F <sub>17</sub> NO <sub>4</sub> S | 555.9517               | 1.0 ± 0.4        |
| Me-FOSAA        | C <sub>11</sub> H <sub>6</sub> F <sub>17</sub> NO <sub>4</sub> S | 569.9673               | 0.2 ± 0.1        |
| Et-FOSAA        | C <sub>12</sub> H <sub>8</sub> F <sub>17</sub> NO <sub>4</sub> S | 583.9830               | 0.5 ± 0.2        |

110

111

112

113

114 **Table S6** – Information about suspects analytical standards.

| Compound name                                   | CAS         | Structure                                                                            | Supplier      |
|-------------------------------------------------|-------------|--------------------------------------------------------------------------------------|---------------|
| Perfluoro-4-ethylcyclohexane sulfonate (PFECHS) | 646-83-3    | 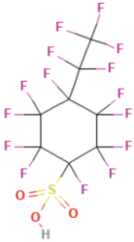    | Chiron AS     |
| Teriflunomide                                   | 163451-81-8 |     | Merck         |
| Lansoprazole                                    | 103577-45-3 |   | Merck         |
| Lansoprazole sulfide                            | 103577-40-8 |  | Cymit Quimica |
| Lansoprazole sulfone                            | 131926-99-3 |   | Cymit Quimica |
| Pantoprazole sodium                             | 164579-32-2 |  | Merck         |
| Pantoprazole sulfone                            | 127780-16-9 |  | Cymit Quimica |

115 **1.4. Fluorine mass-balance calculations**

116 To allow the comparison between the concentrations of EOF and identified suspects, molecular  
117 concentrations (i.e., ng substance per mL of serum) were converted to fluorine equivalents (i.e.,  
118 ng fluorine per mL of serum) using equation S1.

119

$$\text{Concentration} \left( \frac{\text{ng F}}{\text{mL}} \right) = \frac{\text{concentration} \left( \frac{\text{ng}}{\text{mL}} \right) \cdot nF \cdot AW_F}{MW_{SUSPECT}} \quad (\text{S1})$$

120

121 where nF is the number of fluorine atoms in the suspect structure, A<sub>F</sub> is the atomic weight of  
122 fluorine and MW<sub>SUSPECT</sub> is the molecular weight of the suspect which concentration is being  
123 converted.

124

125 **1.5. TOP assay on model CF<sub>3</sub>-pharmaceuticals and agrochemicals**

126 The samples after oxidation were analyzed for trifluoroacetic acid (TFA) using a quaternary  
127 Accela 1250 pump with a PAL Sample Manager coupled to a Vantage TSQ MS/MS (Thermo  
128 Fisher Scientific, Waltham, MA, USA) and on the LC-Orbitrap-Exploris system mentioned  
129 above to check for the presence of the model substances. TFA was analysed with a Raptor  
130 Polar X column with a 5 minute isocratic run with 80 % 2mM ammonium acetate in methanol  
131 and 20 % 2mM ammonium acetate in 90:10 water:methanol as described by Cioni et al. [1].  
132 The LC-Orbitrap Exploris analysis was performed in full scan with data independent  
133 acquisition (DIA) to screen the samples after oxidation for the presence of the model substances  
134 and transformation products other than TFA.

135

136

137

138 **1.6. Statistical analysis**

139 Differences in PFECHS/UPFOS,  $\sum_{13}$  PFAS,  $\sum$ F-pharmaceuticals and UEOF between  
140 sampling years as described by Cioni et al. [1] using multiple linear regression with the  
141 following equation:

$$y = \beta_0 + \beta_1 dummy\ 1 + \beta_2 dummy\ 2 + \beta_3 sex + \beta_4 age \quad (S2)$$

142 where  $y$  is the log transformed concentration;  $\beta_0$  is the intercept of the multiple linear  
143 regression;  $\beta_1, \beta_2, \beta_3$  and  $\beta_4$  are the regression coefficients for the predictor variables; dummy  
144 1 is a dummy variable equal to 1 if sampling year is 1986, equal to 0 if sampling year is 2007  
145 or 2015; dummy 2 is a dummy variable equal to 1 if sampling year is 2015, equal to 0 if  
146 sampling year is 1986 and 2007; sex is categorical variable equal to 0 for women and equal to  
147 1 for men; age is the weighted mean age of the individuals making up each pool expressed in  
148 years.

149 When sex was a significant predictor, differences in concentrations between men and women  
150 at each sampling year were evaluated by adding an interaction term between sex and each  
151 sampling year dummy variable as described by equation S3.

152

$$y = \beta_0 + \beta_1 dummy\ 1 + \beta_2 dummy\ 2 + \beta_3 sex + \beta_4 age + \beta_5 dummy1\ sex + \beta_6 dummy2\ sex \quad (S3)$$

153

154 Statistical significance was set at  $p < 0.05$ . Post-hoc power calculations were performed using  
155 the pwr package.

156

157 **2. Results and discussion**

158 **Table S7** – Suspects detected in 20 human serum pools analyzed by DI-FT-ICR-MS with a  
 159 mass error <0.5 ppm and a similarity score > 70.

| Formula                                                                                      | Exact mass | 1986             |                         |                                   | 2007             |                         |                                   | 2015             |                         |                                   |
|----------------------------------------------------------------------------------------------|------------|------------------|-------------------------|-----------------------------------|------------------|-------------------------|-----------------------------------|------------------|-------------------------|-----------------------------------|
|                                                                                              |            | DF<br>n<br>pools | ppm error<br>Mean ± SD* | Similarity<br>score<br>Mean ± SD* | DF<br>n<br>pools | ppm error<br>Mean ± SD* | Similarity<br>score<br>Mean ± SD* | DF<br>n<br>pools | ppm error<br>Mean ± SD* | Similarity<br>score<br>Mean ± SD* |
| C <sub>4</sub> F <sub>6</sub> O <sub>1</sub> H <sub>3</sub> N <sub>1</sub>                   | 195.0119   | 6                | 0.37 ± 0.02             | 100 ± 0                           | 2                | 0.35 ± 0.00             | NC                                | 0                | -                       | -                                 |
| C <sub>3</sub> F <sub>6</sub> O <sub>1</sub> H <sub>3</sub> N <sub>1</sub>                   | 209.0275   | 11               | 0.35 ± 0.00             | 97 ± 3                            | 4                | 0.35 ± 0.00             | 97 ± 3                            | 5                | 0.36 ± 0.02             | 100 ± 0                           |
| C <sub>4</sub> F <sub>6</sub> O <sub>1</sub> Cl <sub>1</sub> H <sub>3</sub>                  | 215.9777   | 7                | 0.30 ± 0.05             | 93 ± 13                           | 2                | 0.33 ± 0.03             | 100 ± 0                           | 1                | 0.3                     | 100                               |
| C <sub>9</sub> F <sub>4</sub> H <sub>6</sub> N <sub>2</sub>                                  | 218.0467   | 11               | 0.24 ± 0.02             | 91 ± 0                            | 4                | 0.26 ± 0.00             | 91 ± 0                            | 5                | 0.25 ± 0.02             | 91 ± 0                            |
| C <sub>5</sub> F <sub>6</sub> O <sub>3</sub> H <sub>6</sub>                                  | 228.0221   | 2                | 0.41 ± 0.00             | 100 ± 0                           | 0                | -                       | -                                 | 0                | -                       | -                                 |
| C <sub>6</sub> F <sub>6</sub> O <sub>3</sub> H <sub>2</sub>                                  | 235.9908   | 9                | 0.35 ± 0.00             | 100 ± 0                           | 4                | 0.35 ± 0.00             | 100 ± 0                           | 4                | 0.35 ± 0.00             | 100 ± 0                           |
| C <sub>9</sub> F <sub>6</sub> H <sub>7</sub> N <sub>1</sub>                                  | 243.0483   | 10               | 0.34 ± 0.05             | 94 ± 5                            | 4                | 0.36 ± 0.00             | NC                                | 5                | 0.33 ± 0.02             | 100 ± 0                           |
| C <sub>6</sub> F <sub>7</sub> O <sub>2</sub> H <sub>7</sub>                                  | 244.0334   | 9                | 0.40 ± 0.04             | 86 ± 14                           | 4                | 0.43 ± 0.02             | 75 ± 5                            | 4                | 0.39 ± 0.04             | 91 ± 9                            |
| C <sub>7</sub> F <sub>6</sub> O <sub>2</sub> H <sub>11</sub> N <sub>1</sub>                  | 255.0694   | 10               | 0.40 ± 0.03             | 94 ± 0                            | 4                | 0.38 ± 0.03             | 96 ± 0                            | 5                | 0.36 ± 0.02             | 100 ± 0                           |
| C <sub>6</sub> F <sub>6</sub> O <sub>2</sub> Cl <sub>1</sub> H <sub>7</sub>                  | 260.0039   | 10               | 0.39 ± 0.04             | 98 ± 8                            | 4                | 0.41 ± 0.05             | 100 ± 0                           | 5                | 0.38 ± 0.04             | 99 ± 2                            |
| C <sub>5</sub> F <sub>8</sub> O <sub>3</sub> H <sub>2</sub>                                  | 261.9876   | 11               | 0.36 ± 0.04             | 100 ± 0                           | 4                | 0.33 ± 0.04             | NC                                | 5                | 0.31 ± 0.04             | NC                                |
| C <sub>10</sub> F <sub>5</sub> O <sub>2</sub> H <sub>7</sub> N <sub>2</sub>                  | 282.0428   | 1                | 0.14                    | 90                                | 0                | -                       | -                                 | 0                | -                       | -                                 |
| C <sub>10</sub> F <sub>7</sub> O <sub>2</sub> H <sub>5</sub>                                 | 290.0178   | 8                | 0.34 ± 0.02             | 100 ± 0                           | 3                | 0.31 ± 0.00             | 100 ± 0                           | 5                | 0.31 ± 0.00             | 96 ± 5                            |
| C <sub>9</sub> F <sub>4</sub> O <sub>4</sub> H <sub>10</sub> S <sub>1</sub>                  | 290.0236   | 2                | 0.36 ± 0.17             | 86 ± 0                            | 0                | -                       | -                                 | 0                | -                       | -                                 |
| C <sub>9</sub> F <sub>7</sub> O <sub>1</sub> H <sub>5</sub> N <sub>2</sub>                   | 290.0290   | 9                | 0.21 ± 0.08             | 94 ± 5                            | 4                | 0.20 ± 0.03             | 100 ± 0                           | 5                | 0.29 ± 0.03             | NC                                |
| C <sub>11</sub> F <sub>6</sub> O <sub>2</sub> H <sub>12</sub>                                | 290.0741   | 1                | 0.30                    | 100                               | 0                | -                       | -                                 | 0                | -                       | -                                 |
| C <sub>9</sub> F <sub>7</sub> O <sub>2</sub> H <sub>4</sub> N <sub>1</sub>                   | 291.0130   | 8                | 0.19 ± 0.08             | 98 ± 4                            | 4                | 0.25 ± 0.03             | 97 ± 5                            | 5                | 0.27 ± 0.02             | 96 ± 5                            |
| C <sub>7</sub> F <sub>9</sub> O <sub>2</sub> H <sub>5</sub>                                  | 292.0146   | 1                | 0.25                    | 100                               | 0                | -                       | -                                 | 0                | -                       | -                                 |
| C <sub>12</sub> F <sub>6</sub> O <sub>2</sub> H <sub>12</sub>                                | 302.0741   | 11               | 0.16 ± 0.03             | 92 ± 5                            | 4                | 0.13 ± 0.04             | 89 ± 0                            | 5                | 0.18 ± 0.03             | 89 ± 0                            |
| C <sub>11</sub> F <sub>7</sub> O <sub>1</sub> H <sub>8</sub> N <sub>1</sub>                  | 303.0494   | 4                | 0.42 ± 0.03             | 81 ± 0                            | 1                | 0.48                    | NC                                | 1                | 0.44                    | NC                                |
| C <sub>7</sub> F <sub>9</sub> O <sub>2</sub> H <sub>6</sub> N <sub>1</sub>                   | 307.0255   | 11               | 0.45 ± 0.02             | 93 ± 0                            | 4                | 0.45 ± 0.02             | 93 ± 0                            | 5                | 0.46 ± 0.02             | 93 ± 0                            |
| C <sub>11</sub> F <sub>6</sub> O <sub>3</sub> H <sub>14</sub>                                | 308.0847   | 5                | 0.05 ± 0.03             | 89 ± 0                            | 0                | -                       | -                                 | 1                | 0.40                    | NC                                |
| C <sub>10</sub> F <sub>9</sub> O <sub>1</sub> H <sub>9</sub>                                 | 316.0510   | 7                | 0.20 ± 0.04             | 100 ± 0                           | 0                | -                       | -                                 | 0                | -                       | -                                 |
| C <sub>13</sub> F <sub>6</sub> O <sub>2</sub> H <sub>14</sub>                                | 316.0898   | 8                | 0.30 ± 0.08             | 70 ± 4                            | 1                | 0.28                    | 71                                | 1                | 0.25                    | NC                                |
| C <sub>5</sub> F <sub>9</sub> O <sub>1</sub> Cl <sub>2</sub> H <sub>1</sub>                  | 317.9261   | 2                | 0.37 ± 0.02             | 100                               | 0                | -                       | -                                 | 1                | 0.36                    | 100                               |
| C <sub>7</sub> F <sub>12</sub> O <sub>1</sub> H <sub>3</sub> N <sub>1</sub>                  | 345.0023   | 3                | 0.23 ± 0.09             | 87 ± 10                           | 2                | 0.38 ± 0.06             | 93 ± 0                            | 3                | 0.15 ± 0.04             | 93 ± 0                            |
| C <sub>13</sub> F <sub>6</sub> O <sub>2</sub> Cl <sub>1</sub> H <sub>13</sub>                | 350.0508   | 11               | 0.19 ± 0.07             | 92 ± 9                            | 4                | 0.28 ± 0.09             | 86 ± 14                           | 4                | 0.17 ± 0.11             | 90 ± 0                            |
| C <sub>8</sub> F <sub>12</sub> O <sub>2</sub> H <sub>2</sub>                                 | 357.9863   | 8                | 0.41 ± 0.05             | 97 ± 4                            | 3                | 0.37 ± 0.09             | 100 ± 0                           | 4                | 0.42 ± 0.07             | 100 ± 0                           |
| C <sub>12</sub> F <sub>5</sub> O <sub>5</sub> Cl <sub>1</sub> H <sub>6</sub>                 | 359.9824   | 3                | 0.37 ± 0.02             | 85 ± 14                           | 1                | 0.37                    | NC                                | 3                | 0.34 ± 0.02             | 76 ± 0                            |
| C <sub>13</sub> F <sub>6</sub> O <sub>2</sub> Cl <sub>1</sub> H <sub>14</sub> N <sub>1</sub> | 365.0617   | 11               | 0.12 ± 0.09             | 81 ± 17                           | 4                | 0.11 ± 0.09             | NC                                | 3                | 0.08 ± 0.06             | NC                                |
| C <sub>12</sub> F <sub>11</sub> H <sub>3</sub> N <sub>2</sub>                                | 386.0277   | 9                | 0.38 ± 0.08             | 92 ± 7                            | 3                | 0.36 ± 0.02             | NC                                | 5                | 0.38 ± 0.04             | NC                                |
| C <sub>7</sub> F <sub>12</sub> O <sub>4</sub> Cl <sub>1</sub> H <sub>1</sub>                 | 411.9372   | 2                | 0.43 ± 0.09             | 100 ± 0                           | 0                | -                       | -                                 | 0                | -                       | -                                 |
| C <sub>10</sub> F <sub>9</sub> O <sub>3</sub> H <sub>17</sub> N <sub>2</sub> S <sub>1</sub>  | 448.0714   | 6                | 0.46 ± 0.02             | 93 ± 6                            | 1                | 0.42                    | NC                                | 4                | 0.43 ± 0.02             | NC                                |
| C <sub>16</sub> F <sub>6</sub> O <sub>3</sub> Cl <sub>2</sub> H <sub>8</sub> N <sub>2</sub>  | 459.9816   | 1                | 0.33                    | 100                               | 0                | -                       | -                                 | 0                | -                       | -                                 |
| C <sub>8</sub> F <sub>15</sub> O <sub>3</sub> H <sub>1</sub> S <sub>1</sub>                  | 461.9407   | 2                | 0.16 ± 0.05             | 100                               | 1                | 0.09                    | NC                                | 1                | 0.11                    | NC                                |
| C <sub>17</sub> F <sub>6</sub> O <sub>5</sub> H <sub>2</sub> P <sub>1</sub> N <sub>1</sub>   | 465.1140   | 1                | 0.45                    | 100                               | 0                | -                       | -                                 | 0                | -                       | -                                 |
| C <sub>11</sub> F <sub>15</sub> O <sub>2</sub> H <sub>8</sub> N <sub>1</sub>                 | 471.0316   | 10               | 0.25 ± 0.04             | 72 ± 3                            | 2                | 0.22 ± 0.00             | 70 ± 0                            | 4                | 0.26 ± 0.04             | 71 ± 1                            |

|                                                                                              |          |    |             |         |   |             |         |   |             |         |
|----------------------------------------------------------------------------------------------|----------|----|-------------|---------|---|-------------|---------|---|-------------|---------|
| C <sub>8</sub> F <sub>15</sub> O <sub>4</sub> HS                                             | 477.9356 | 0  | -           | -       | 2 | 0.25 ± 0.00 | 90 ± 0  | 0 | -           | -       |
| C <sub>15</sub> F <sub>9</sub> O <sub>3</sub> H <sub>21</sub> N <sub>2</sub> S <sub>1</sub>  | 480.1129 | 7  | 0.40 ± 0.05 | 84 ± 2  | 1 | 0.44        | 83      | 4 | 0.47 ± 0.01 | 83 ± 0  |
| C <sub>12</sub> F <sub>11</sub> O <sub>6</sub> H <sub>4</sub> N <sub>3</sub>                 | 494.9924 | 11 | 0.14 ± 0.11 | 77 ± 1  | 3 | 0.19 ± 0.13 | NC      | 3 | 0.23 ± 0.15 | NC      |
| C <sub>11</sub> F <sub>17</sub> O <sub>3</sub> H <sub>5</sub>                                | 507.9967 | 7  | 0.03 ± 0.02 | 100 ± 0 | 4 | 0.03 ± 0.02 | 100 ± 0 | 3 | 0.12 ± 0.08 | 100 ± 0 |
| C <sub>19</sub> F <sub>13</sub> O <sub>1</sub> H <sub>11</sub> N <sub>2</sub>                | 530.0664 | 4  | 0.40 ± 0.07 | NC      | 1 | 0.47        | 100     | 0 | -           | -       |
| C <sub>13</sub> F <sub>17</sub> O <sub>2</sub> H <sub>12</sub> N <sub>1</sub>                | 537.0597 | 6  | 0.36 ± 0.09 | 72 ± 0  | 3 | 0.30 ± 0.12 | 72 ± 0  | 4 | 0.26 ± 0.12 | 76 ± 0  |
| C <sub>14</sub> F <sub>17</sub> O <sub>4</sub> H <sub>7</sub>                                | 562.0073 | 3  | 0.21 ± 0.14 | 100 ± 0 | 1 | 0.03        | NC      | 3 | 0.15 ± 0.12 | 91 ± 13 |
| C <sub>18</sub> F <sub>17</sub> O <sub>4</sub> H <sub>9</sub>                                | 612.0229 | 4  | 0.21 ± 0.07 | 84 ± 0  | 1 | 0.31        | 100     | 1 | 0.17        | NC      |
| C <sub>15</sub> F <sub>19</sub> O <sub>2</sub> H <sub>13</sub> N <sub>2</sub>                | 614.0674 | 1  | 0.40        | NC      | 1 | 0.06        | 100     | 1 | 0.15        | 86      |
| C <sub>14</sub> F <sub>17</sub> O <sub>4</sub> H <sub>14</sub> N <sub>1</sub> S <sub>1</sub> | 615.0372 | 2  | 0.12 ± 0.03 | 100 ± 0 | 1 | 0.14        | 100     | 2 | 0.05 ± 0.01 | 87 ± 0  |
| C <sub>16</sub> F <sub>17</sub> O <sub>4</sub> H <sub>8</sub> P <sub>1</sub>                 | 617.9889 | 1  | 0.04        | 81      | 0 | -           | -       | 0 | -           | -       |
| C <sub>17</sub> F <sub>19</sub> O <sub>1</sub> H <sub>19</sub> N <sub>2</sub>                | 628.1194 | 0  | -           | -       | 1 | 0.06        | 80      | 0 | -           | -       |
| C <sub>13</sub> F <sub>24</sub> O <sub>1</sub> H <sub>4</sub>                                | 631.9879 | 2  | 0.29 ± 0.09 | NC      | 1 | 0.04        | 88      | 2 | 0.36 ± 0.14 | 88 ± 0  |
| C <sub>16</sub> F <sub>17</sub> O <sub>3</sub> H <sub>9</sub> N <sub>2</sub> S <sub>1</sub>  | 632.0062 | 2  | 0.26 ± 0.08 | NC      | 1 | 0.37        | 100     | 2 | 0.26 ± 0.20 | 100 ± 0 |
| C <sub>12</sub> F <sub>19</sub> O <sub>1</sub> I <sub>1</sub> H <sub>6</sub>                 | 653.9160 | 2  | 0.33 ± 0.18 | NC      | 2 | 0.24 ± 0.03 | NC      | 2 | 0.31 ± 0.20 | 89 ± 0  |
| C <sub>14</sub> F <sub>17</sub> O <sub>1</sub> I <sub>1</sub> H <sub>15</sub> N <sub>1</sub> | 662.9927 | 2  | 0.02 ± 0.01 | 100 ± 0 | 0 | -           | -       | 0 | -           | -       |
| C <sub>18</sub> F <sub>19</sub> O <sub>4</sub> H <sub>15</sub> N <sub>2</sub>                | 684.0728 | 1  | 0.05        | NC      | 2 | 0.14 ± 0.1  | 80 ± 3  | 0 | -           | -       |

160

161

162 **Table S8** - Suspect PFAS detected by LC-Orbitrap-HRMS with mass error < 2 ppm.

| Molecular formula                                | Theoretical m/z | Mass error (ppm) | Retention time (min) |
|--------------------------------------------------|-----------------|------------------|----------------------|
|                                                  |                 | Mean ± SD*       | Mean ± SD*           |
| C <sub>9</sub> H <sub>13</sub> F <sub>7</sub> O  | 269.0782        | 0.5 ± 0.1        | 5.2 ± 0.1            |
| C <sub>8</sub> HF <sub>15</sub> O <sub>3</sub> S | 460.9334        | 1.0 ± 0.3        | 6.8 ± 0.1            |
| C <sub>8</sub> HF <sub>15</sub> O <sub>4</sub> S | 476.9283        | 0.5 ± 0.3        | 7.0 ± 0.1            |

\*SD=standard deviation

163

164

165 **Table S9** - Multiple linear regression coefficients estimates and 95% confidence intervals for  
 166  $\ln(\text{PFECHS/UPFOS})$ ,  $\ln(\sum 13\text{PFAS})$ ,  $\ln(\sum \text{F-pharmaceuticals})$  and  $\ln(\text{UEOF})$  in pooled serum  
 167 samples from the Tromsø Study.

|                                          | <b><math>\ln(\text{PFECHS/UPFOS})</math></b> | <b><math>\ln(\sum 13\text{PFAS})</math></b> | <b><math>\ln(\sum \text{F-pharmaceuticals})</math></b> | <b><math>\ln(\text{UEOF})</math></b> |
|------------------------------------------|----------------------------------------------|---------------------------------------------|--------------------------------------------------------|--------------------------------------|
|                                          | Estimate (95% CI)                            | Estimate (95% CI)                           | Estimate (95% CI)                                      | Estimate (95% CI)                    |
| $\beta_0$ (intercept)                    | -0.90*** (-1.19 to -0.61)                    | 1.63*** (1.19 to 2.08)                      | 1.19 (-7.16 to 9.36)                                   | 3.66 (-4.78 to 12.1)                 |
| $\beta_1$ (1986-2007)                    | 0.16* (0.04 to 0.27)                         | 0.11 (-0.28 to 0.07)                        | -4.11* (-7.44 to -0.77)                                | 3.33* (0.07 to 6.74)                 |
| $\beta_2$ (2015-2007)                    | -0.26*** (-0.34 to -0.18)                    | -0.46*** (-0.59 to -0.34)                   | 5.77*** (3.47 to 8.06)                                 | -1.68 (-4.02 to 0.67)                |
| $\beta_3$ (sex)                          | 0.10** (0.03 to 0.16)                        | 0.20*** (0.11 to 0.30)                      | -0.27 (-2.01 to 1.47)                                  | -1.96* (-3.74 to -0.19)              |
| $\beta_4$ (age mean)                     | 0.01*** (0.01 to 0.02)                       | 0.02*** (0.01 to 0.03)                      | -0.08 (-0.21 to 0.04)                                  | -0.08 (-0.21 to 0.04)                |
| R <sup>2</sup>                           | 0.588                                        | 0.766                                       | 0.561                                                  | 0.569                                |
| F-test p-value                           | 0.000                                        | 0.000                                       | 0.000                                                  | 0.000                                |
| *p < 0.05<br>**p < 0.01<br>*** p < 0.001 |                                              |                                             |                                                        |                                      |

168

169

170 **Table S10** – Multiple linear regression (including sex and sampling year interaction terms)  
 171 coefficients estimates and 95% confidence intervals for  $\ln(\text{PFECHS/UPFOS})$ ,  $\ln(\sum 13\text{PFAS})$   
 172 and  $\ln(\text{UEOF})$  in pooled serum samples from the Tromsø Study.

|                                          | <b><math>\ln(\text{PFECHS/UPFOS})</math></b> | <b><math>\ln(\sum 13\text{PFAS})</math></b> | <b><math>\ln(\text{UEOF})</math></b> |
|------------------------------------------|----------------------------------------------|---------------------------------------------|--------------------------------------|
|                                          | Estimate (95% CI)                            | Estimate (95% CI)                           | Estimate (95% CI)                    |
| $\beta_0$ (intercept)                    | -0.87*** (-1.15 to -0.58)                    | 1.65*** (1.19 to 2.11)                      | 5.88 (-1.98 to 13.7)                 |
| $\beta_1$ (1986-2007)                    | 0.09 (-0.04 to 0.22)                         | -0.14 (-0.35 to 0.07)                       | 0.75 (-2.91 to 4.42)                 |
| $\beta_2$ (2015-2007)                    | -0.24*** (-0.34 to -0.15)                    | -0.46*** (-0.62 to -0.30)                   | -3.78** (-6.49 to -1.07)             |
| $\beta_3$ (2007 sex)                     | 0.06 (-0.04 to 0.16)                         | 0.18* (0.02 to 0.34)                        | -5.33*** (-8.03 to -2.64)            |
| $\beta_4$ (age mean)                     | 0.01*** (0.01 to 0.02)                       | 0.02*** (0.01 to 0.03)                      | -0.09 (-0.21 to 0.02)                |
| $\beta_5$ (1986 sex)                     | 0.12 (-0.01 to 0.27)                         | 0.07 (-0.16 to 0.30)                        | 5.35** (1.43 to 9.26)                |
| $\beta_6$ (2015 sex)                     | -0.02 (-0.17 to 0.11)                        | -0.01 (-0.23 to 0.23)                       | 5.26* (1.26 to 9.26)                 |
| R <sup>2</sup>                           | 0.636                                        | 0.769                                       | 0.657                                |
| F-test p-value                           | 0.000                                        | 0.000                                       | 0.000                                |
| *p < 0.05<br>**p < 0.01<br>*** p < 0.001 |                                              |                                             |                                      |

173

174

175

176 **References**

- 177 1. Cioni, L., et al., *Fluorine Mass Balance, including Total Fluorine, Extractable Organic*  
178 *Fluorine, Oxidizable Precursors, and Target Per- and Polyfluoroalkyl Substances, in*  
179 *Pooled Human Serum from the Tromsø Population in 1986, 2007, and 2015.*  
180 *Environmental Science & Technology*, 2023. **57**(40): p. 14849-14860.
- 181 2. Hanssen, L., et al., *Partition of perfluoroalkyl substances (PFASs) in whole blood and*  
182 *plasma, assessed in maternal and umbilical cord samples from inhabitants of arctic*  
183 *Russia and Uzbekistan.* *Sci Total Environ*, 2013. **447**: p. 430-7.
- 184
